# Supplementary material for: Daily Head and Neck Treatment Assessment for Optimal Proton Therapy Planning Robustness
Source: MDPI journal article supplement (doi:10.3390/cancers15143719), 2023-07-22
Supplement: s1 [file s1]

**supplementary material****Table S1:** Per Patient Organ Fractionation

| ROI             | # Patients | # Fractions |
|-----------------|------------|-------------|
| CTV_Primary     | 6          | 203         |
| CTV_Secondary   | 5          | 358         |
| Brainstem       | 6          | 203         |
| Cord            | 3          | 97          |
| Mandible        | 4          | 126         |
| Parotid_L       | 5          | 173         |
| Parotid_R       | 5          | 175         |
| Cochlea_L       | 4          | 140         |
| Cochlea_R       | 3          | 112         |
| Cricopharyngeus | 2          | 66          |
| Esophagus       | 3          | 107         |
| Eye_L           | 2          | 77          |
| Eye_R           | 2          | 77          |
| OpticChiasm     | 3          | 110         |
| OpticNrv_L      | 3          | 110         |
| OpticNrv_R      | 3          | 110         |

**Table S2:** Treatment Shifts (cm)

| Shift dimension    | PO   | PNN  | P-value |
|--------------------|------|------|---------|
| Superior/Inferior  | 0.12 | 0.08 | 0.01    |
| Lateral            | 0.09 | 0.08 | 0.27    |
| Anterior/Posterior | 0.17 | 0.09 | <0.01   |
| Coronal            | 0.62 | 0.36 | <0.01   |
| Sagittal           | 0.63 | 0.39 | <0.01   |
| Transverse         | 1.03 | 0.63 | <0.01   |
| Average            | 0.44 | 0.27 | <0.01   |
