# Supplementary figures and images for: Daily Head and Neck Treatment Assessment for Optimal Proton Therapy Planning Robustness
Source: MDPI journal article supplement (doi:10.3390/cancers15143719), 2023-07-22

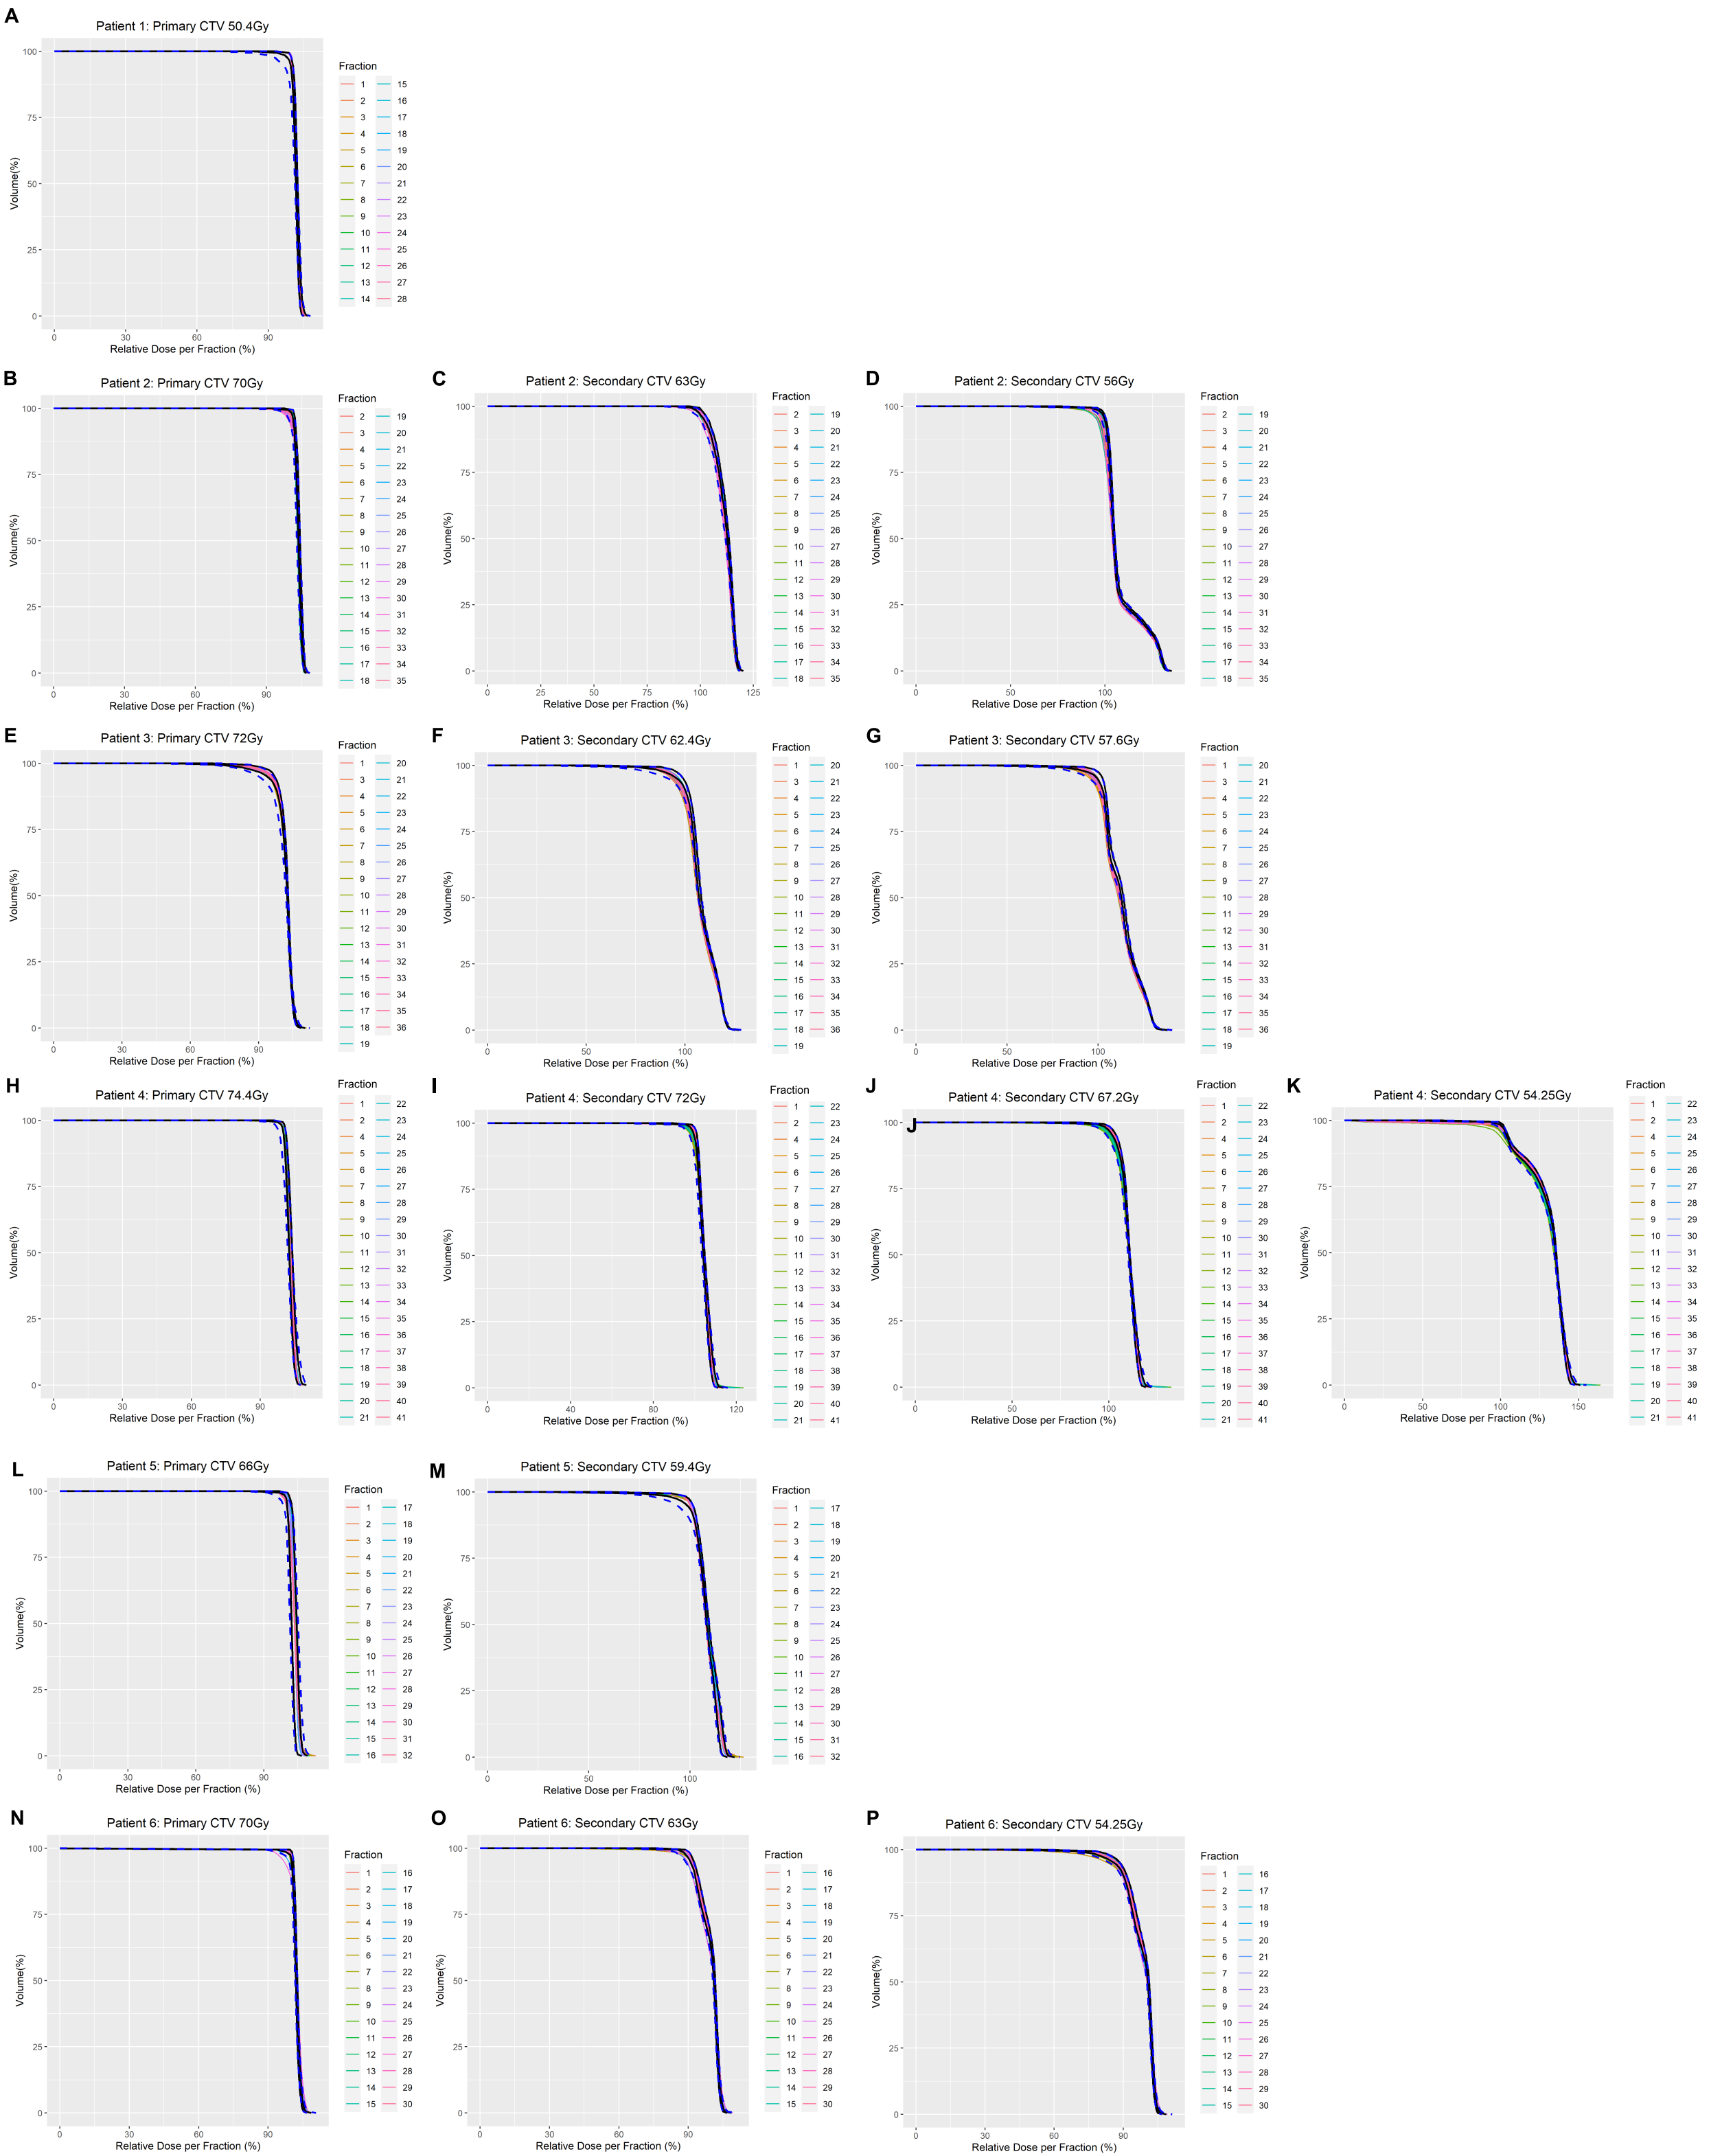

Supplement: s1 [file s1]
